# Supplementary material for: In situ generating Cu2O/Cu heterointerfaces on the Cu2O cube surface to enhance interface charge transfer for the Rochow reaction
Source: Royal Society of Chemistry journal article supplement (doi:10.1039/d0cy02015j), 2021-01-01
Supplement: d0cy02015j1.pdf [file d0cy02015j1.pdf]

## Supporting Information for

### In-situ Generating Cu<sub>2</sub>O/Cu Heterointerfaces on Cu<sub>2</sub>O Cube Surface to Enhance Interface Charge Transfer for Rochow Reaction

Fei Tang,<sup>a,b</sup> Jing Li,<sup>b,\*</sup> Yongxia Zhu,<sup>b</sup> Yongjun Ji,<sup>c</sup> Huifang Li,<sup>b</sup> Hezhi Liu,<sup>b</sup> Xueguang Wang,<sup>a,\*</sup> Ziyi Zhong,<sup>d,e</sup> and Fabing Su<sup>b,f\*</sup>

<sup>a</sup> State Key Laboratory of Advanced Special Steel, School of Materials Science and Engineering, Shanghai University, Shanghai 200072, China

<sup>b</sup> State Key Laboratory of Multiphase Complex Systems, Institute of Process Engineering, Chinese Academy of Sciences, Beijing 100190, China

<sup>c</sup> School of Light Industry, Beijing Technology and Business University, Beijing 100048, China

<sup>d</sup> College of Engineering, Guangdong Technion Israel Institute of Technology (GTIIT), 241 Daxue Road, Shantou, 515063, PR China

<sup>e</sup> Technion-Israel Institute of Technology (IIT), Haifa 32000, Israel

<sup>f</sup> Institute of Industrial Chemistry and Energy Technology, Shenyang University of Chemical Technology, Shenyang 110142, China

\*To whom correspondence should be addressed. E-mail address: [lijing17@ipe.ac.cn](mailto:lijing17@ipe.ac.cn) (J. li);

[wxc228@shu.edu.cn](mailto:wxc228@shu.edu.cn) (X. Wang); [fbsu@ipe.ac.cn](mailto:fbsu@ipe.ac.cn) (F. Su).

## Part I: Supplementary Note

**Supply note 1:** Chemical titration analysis was used to determine the content of Cu, Cu<sub>2</sub>O components within a sample. Typically, 0.3 g of sample was put into a flask containing 120.0 mL of acetonitrile (CH<sub>3</sub>CN, 95%), followed by adding 40.0 mL of dilute HCl (18.5 wt.%). After vigorous rocking for 20 s, the mixture was filtered immediately. Subsequently, 160.0 mL of deionized water was added into the filtrate, which was then titrated with 0.02 mol·L<sup>-1</sup> of KMnO<sub>4</sub> aqueous solution (≥99.5%) (Eq. (1)). The residual solid precipitate was dissolved in 20.0 mL of FeCl<sub>3</sub> solution (0.1 mol·L<sup>-1</sup>), which was kept at 50 °C in water bath and then cooled down to room temperature (Eq. (2)). Afterwards, 20.0 mL of MnSO<sub>4</sub> solution (0.7 mol·L<sup>-1</sup>) and 100.0 mL of deionized water were introduced, which was again titrated with 0.02 mol·L<sup>-1</sup> of KMnO<sub>4</sub> solution (Eq. (3)). The content of Cu<sub>2</sub>O in the sample can be calculated by the consumed amount of KMnO<sub>4</sub> according to Eq. (1), and the content of Cu is calculated through the amount of ferrous iron derived from consumed amount of KMnO<sub>4</sub> according to Eq. (3).

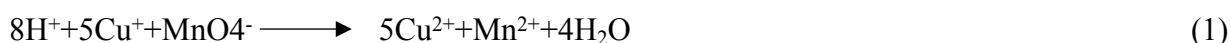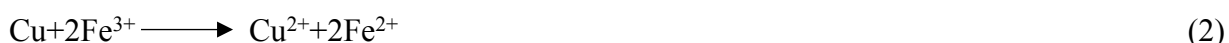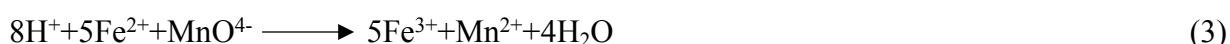

**Supply note 2:** Put 2 g of the contact masses after the reaction into a flask containing 10.0 mL of nitric acid (HNO<sub>3</sub>, 65%) and kept at room temperature for 10 h. Then the resulting solid precipitate was recovered by filtration, washed with deionized water. Finally, the products were dried in oven at 50 °C for 10 h.

## Part II: Supplementary Figures

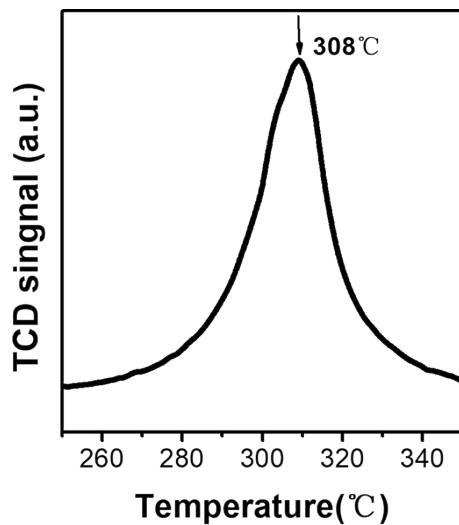

Fig. S1. CO-TPR profiles of cubic Cu<sub>2</sub>O

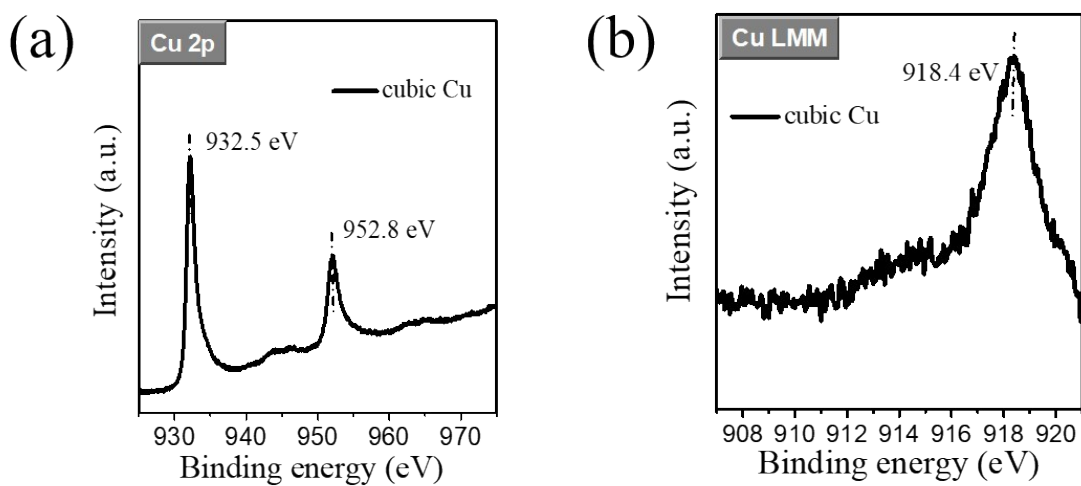

Fig. S2. XPS spectra of Cu 2p (a), Cu LMM (b) for cubic Cu.

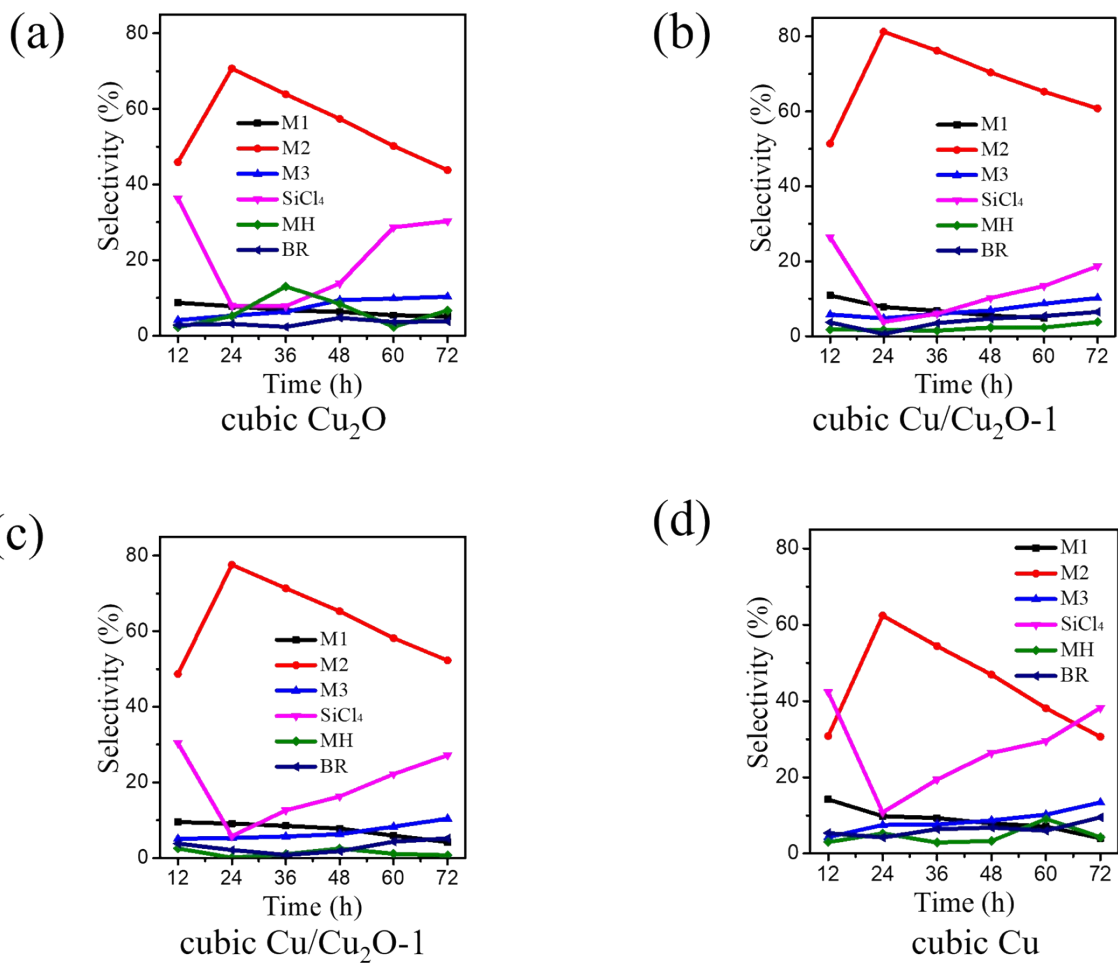

**Fig.S3.** Analysis of the catalytic products distribution with Time: (a) cubic Cu<sub>2</sub>O ; (b) cubic Cu/Cu<sub>2</sub>O-1 ; (c) cubic Cu/Cu<sub>2</sub>O-2 (d) cubic Cu

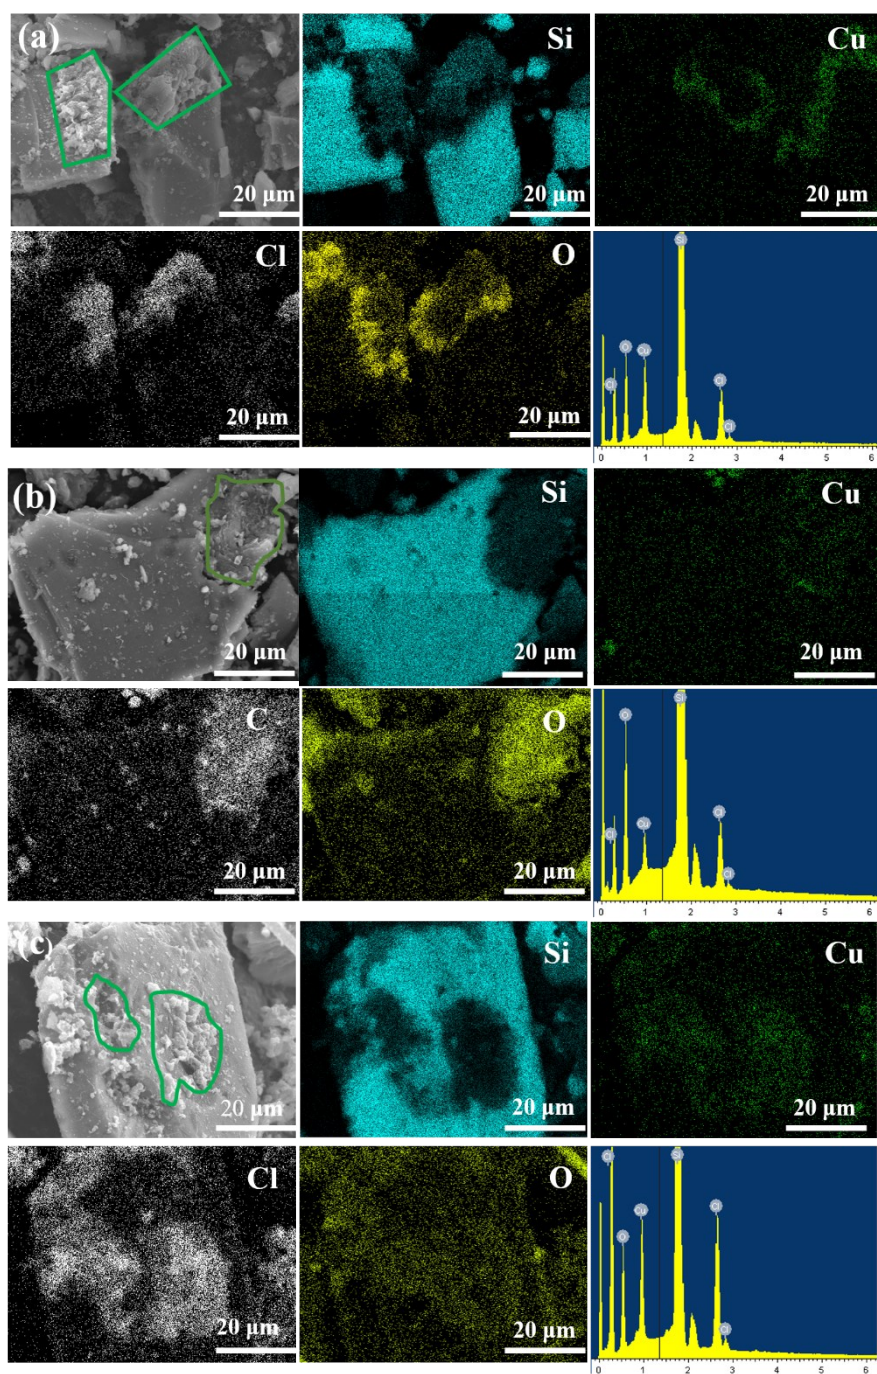

**Fig. S4.** SEM and the corresponding EDS mapping images, as well as EDS spectra of the Si particle surface after the reaction in the presence of cubic Cu (a), cubic Cu/Cu<sub>2</sub>O-2 (b), cubic Cu (c).

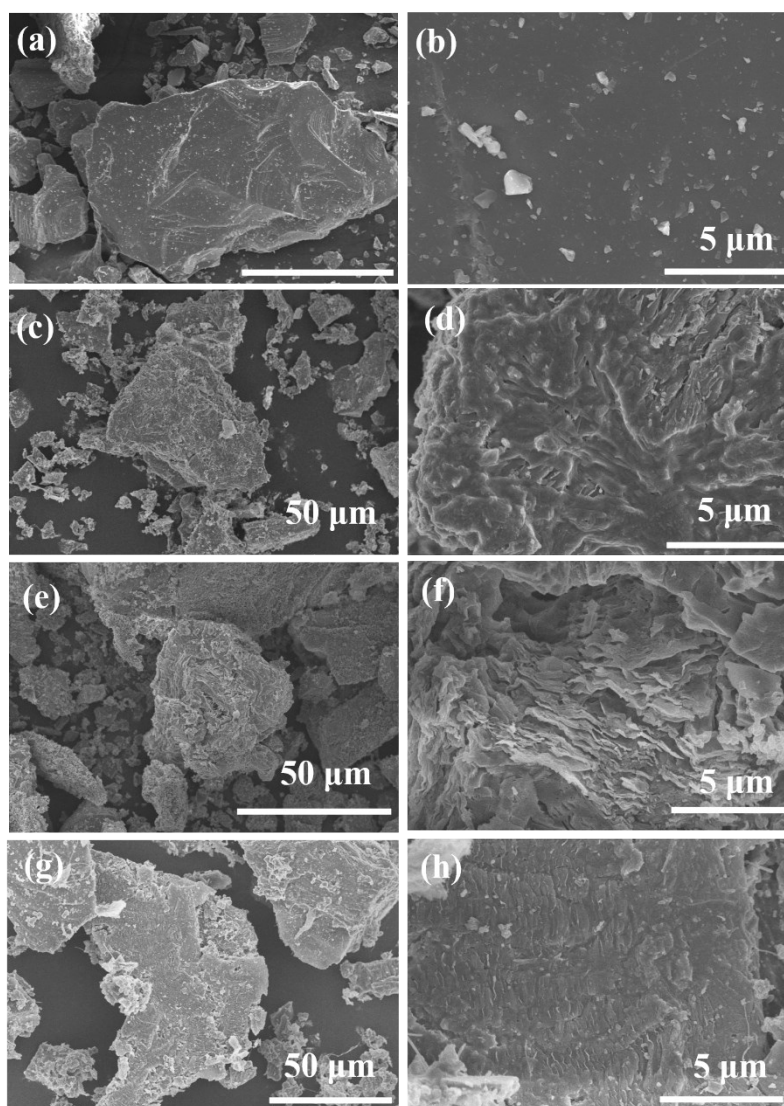

**Fig. S5.** SEM images of pure Si particles after 72 h reaction in the presence of cubic  $\text{Cu}_2\text{O}$  (a, b), cubic  $\text{Cu}/\text{Cu}_2\text{O}$ -1 (c, d), cubic  $\text{Cu}$  (e, f) nanoparticles after removing surface copper species.

### Part III: Supplementary Tables

| Sample                       | (111) | (220) | (311) |
|------------------------------|-------|-------|-------|
| cubic Cu <sub>2</sub> O      | 53.4% | 30.5% | 15.1% |
| cubic Cu/Cu <sub>2</sub> O-1 | 48.2% | 23.9% | 27.9% |
| cubic Cu/Cu <sub>2</sub> O-2 | 49.2% | 28.2% | 22.6% |
| cubic Cu                     | 50.7% | 34.2% | 16.1% |

**Table S1** Intensity ratio of crystal planes for the waste contact masses from XRD patterns
